# Supplementary material for: BRAF V600E Mutation in Ameloblastoma: A Systematic Review and Meta-Analysis
Source: MDPI journal article supplement (doi:10.3390/cancers14225593), 2022-11-14
Supplement: s1 [file s1]

## Supplementary

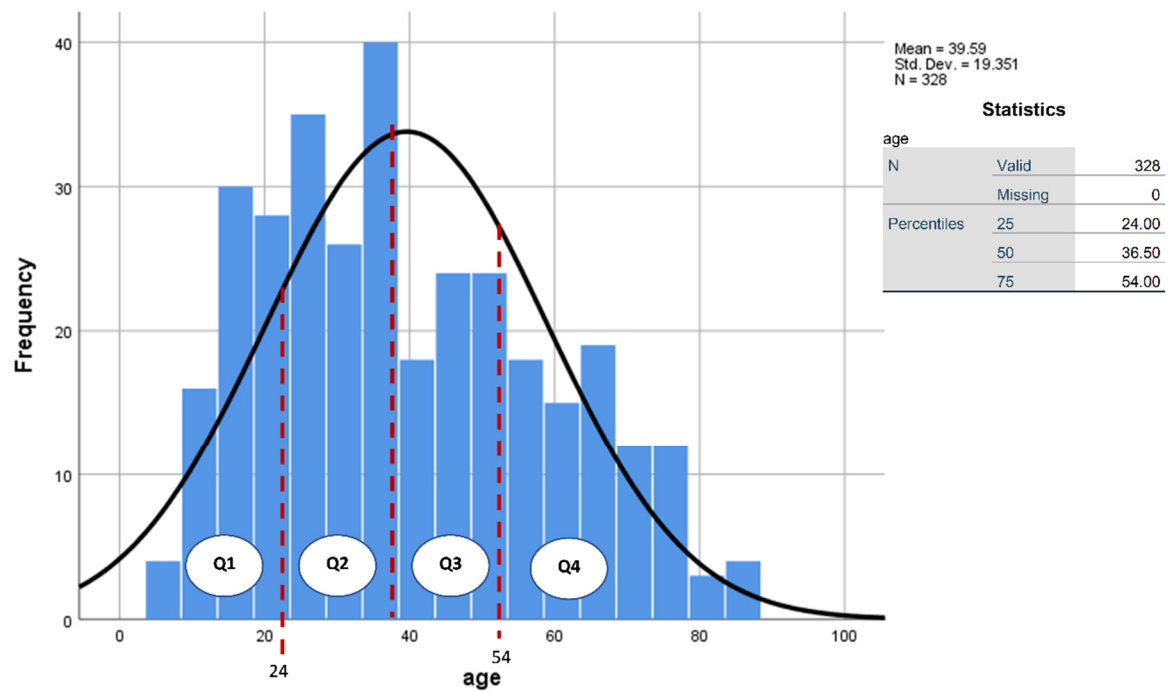

**Figure S1:** Histogram of age group distribution and quartiles. Q1, quartile 1 (age below 24 years old); Q2, quartile 2 (age between 24 and 37 years old); Q3, quartile 3 (age between 37 and 54 years old); Q4, quartile 4 (age above 54 years old).
